# Supplementary material
Source: Research Square preprint supplement (doi:10.21203/rs.3.rs-9836814/v1)
Supplement: Supplementary file 1 [file 8837333e41aee2053f1ac155.docx]

**Supplementary Figure 1**

**Phylogenetic tree: salmon TRIM genes**

**General methodology**

TRIM genes in Atlantic salmon were identified with OrthoFinder (v.2.5.4). Before analysis, proteomes of a considerably large list of fish species, including *Salmo salar* (Ssal_v3.1), and some outgroups, were downloaded from the Ensembl or NCBI databases (Supplementary table 1). Proteomes were filtered to leave only one transcript per gene (the largest one). OrthoFinder was then run with default options (diamond for sequence search and an inflation parameter of 1.5 for MCL clustering) to obtain the orthogroups. Among all orthogroups, those clustering TRIM proteins (four major groups, including btr, finTRIM, TRIM-like and TRIM25) were identified using the SMART analysis web service. Only Atlantic salmon sequences were kept.

To infer the phylogenetic tree, a multiple sequence alignment was performed using MAFFT, using the L-INS-i iterative refinement method with a maximum of 1,000 cycles. These two alignments were used to construct a Maximum-Likelihood tree with IQ-TREE using ModelFinder to determine the best-fit substitution model (JTT+F+R7 according to BIC), and 10,000 ultrafast bootstraps to assess branch supports. The option “*-bnni*” was also used to reduce the risk of overestimating branch supports in case of severe model violations.

Pairwise distance matrices for sequence similarity were calculated from the aligned sequences with the function dist.alignment() from the R package ‘seqinr’. This function outputs a root distance matrix that can be converted to a similarity matrix as follows: S = 1 - (root distance)2.

Trees were illustrated using the R package ‘*ggtree’*. Tip labels include Ensembl information: gene name, chromosome number (genes located on unplaced-scaffolds are indicated by “-”), and accession code. Similarities are shown as heatmap columns due to the size of the figures.


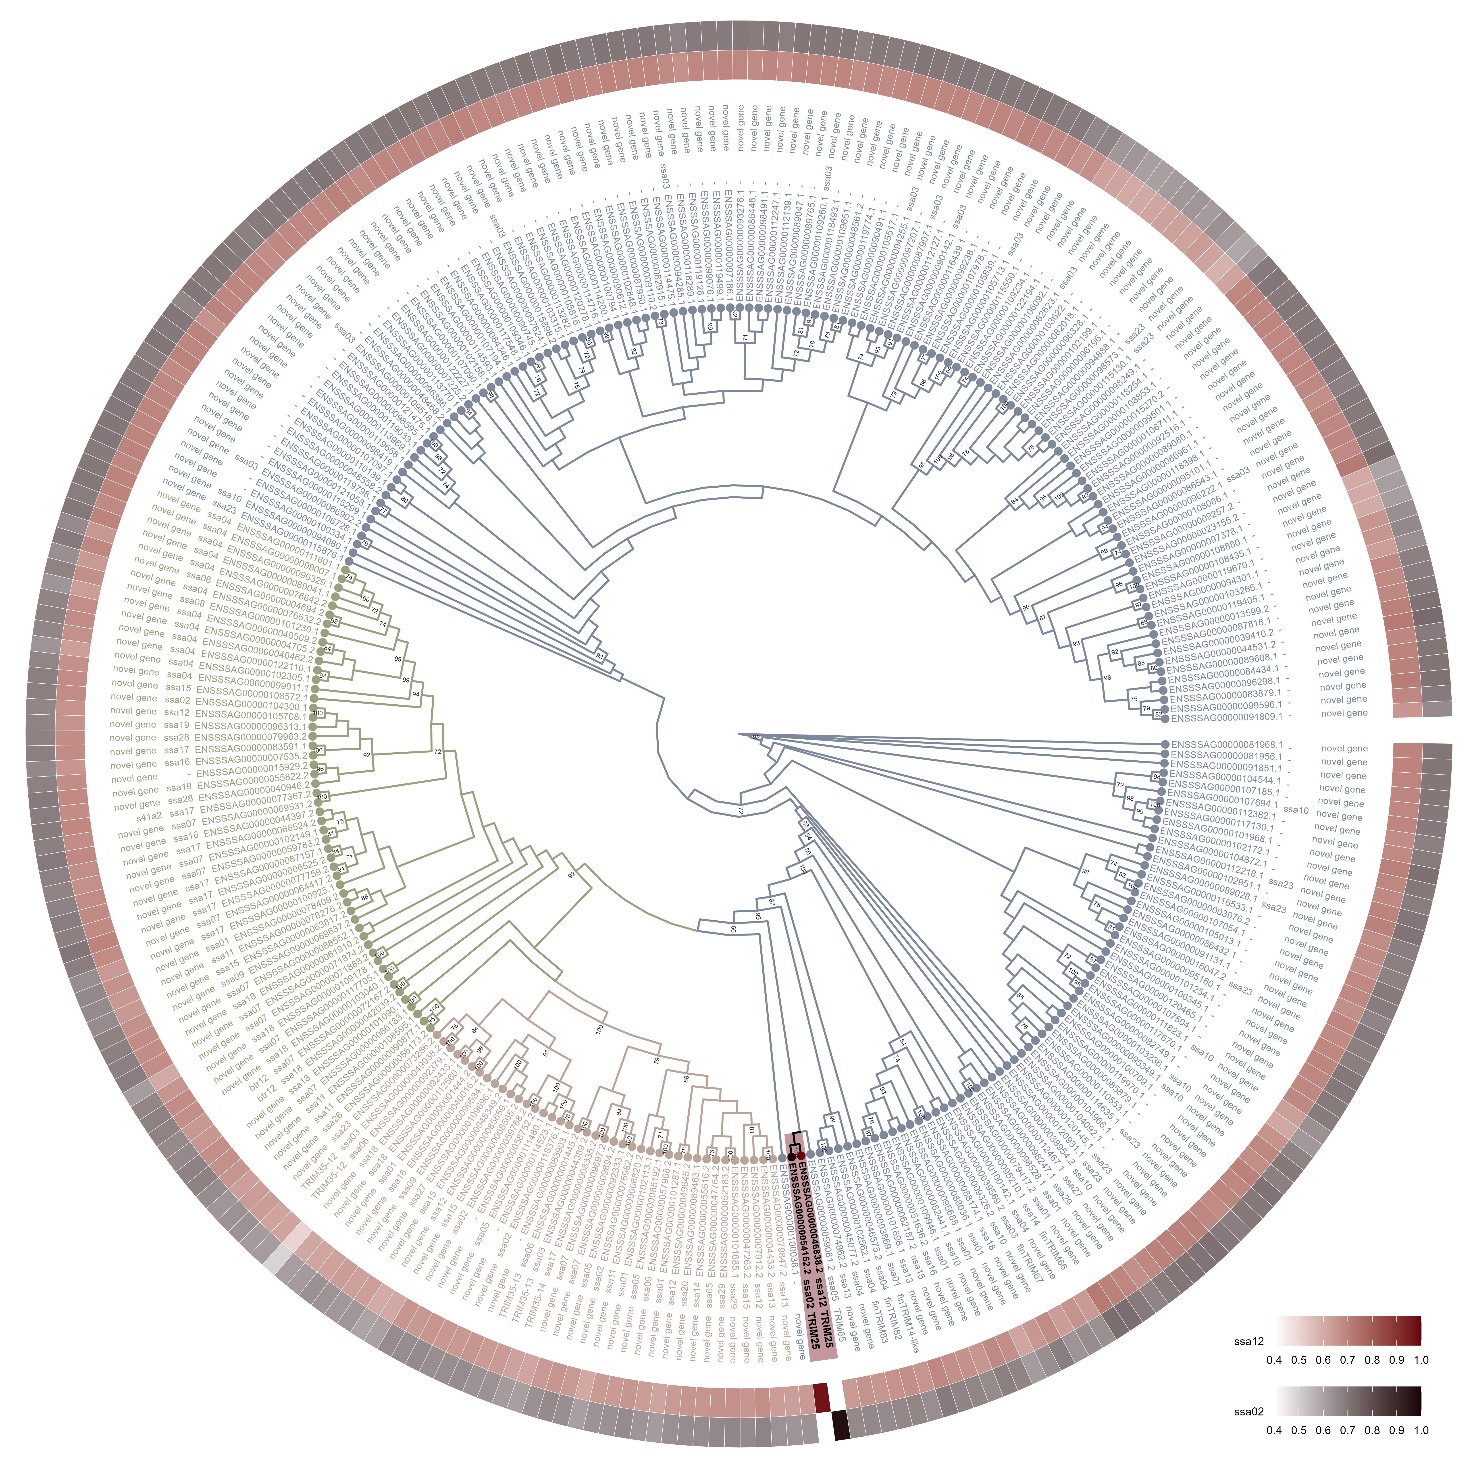


**Figure 1- ML tree inferred from the MAFFT alignment**. Colors indicate the orthogroups identified by OrthoFinder (blue: include finTRIMs; orange: TRIM35; green: btr; black highlighted in red: TRIM25).

**Supplementary Figure 2** – Area under curve analysis for *trim25* paralog expression

*Area under curve analysis of trim25 paralog gene expression quantified and analysed via one-way ANOVA in GraphPad Prism. Error bars represent SEM.*

**Supplementary Figure 3 – Genome editing of *trim25***

1. **Guide targeting Ssa02 *trim25***

Ssa02 *trim25* SHK-1 polyclonal cell pool – Day 0 pre-infection – 97% INDEL


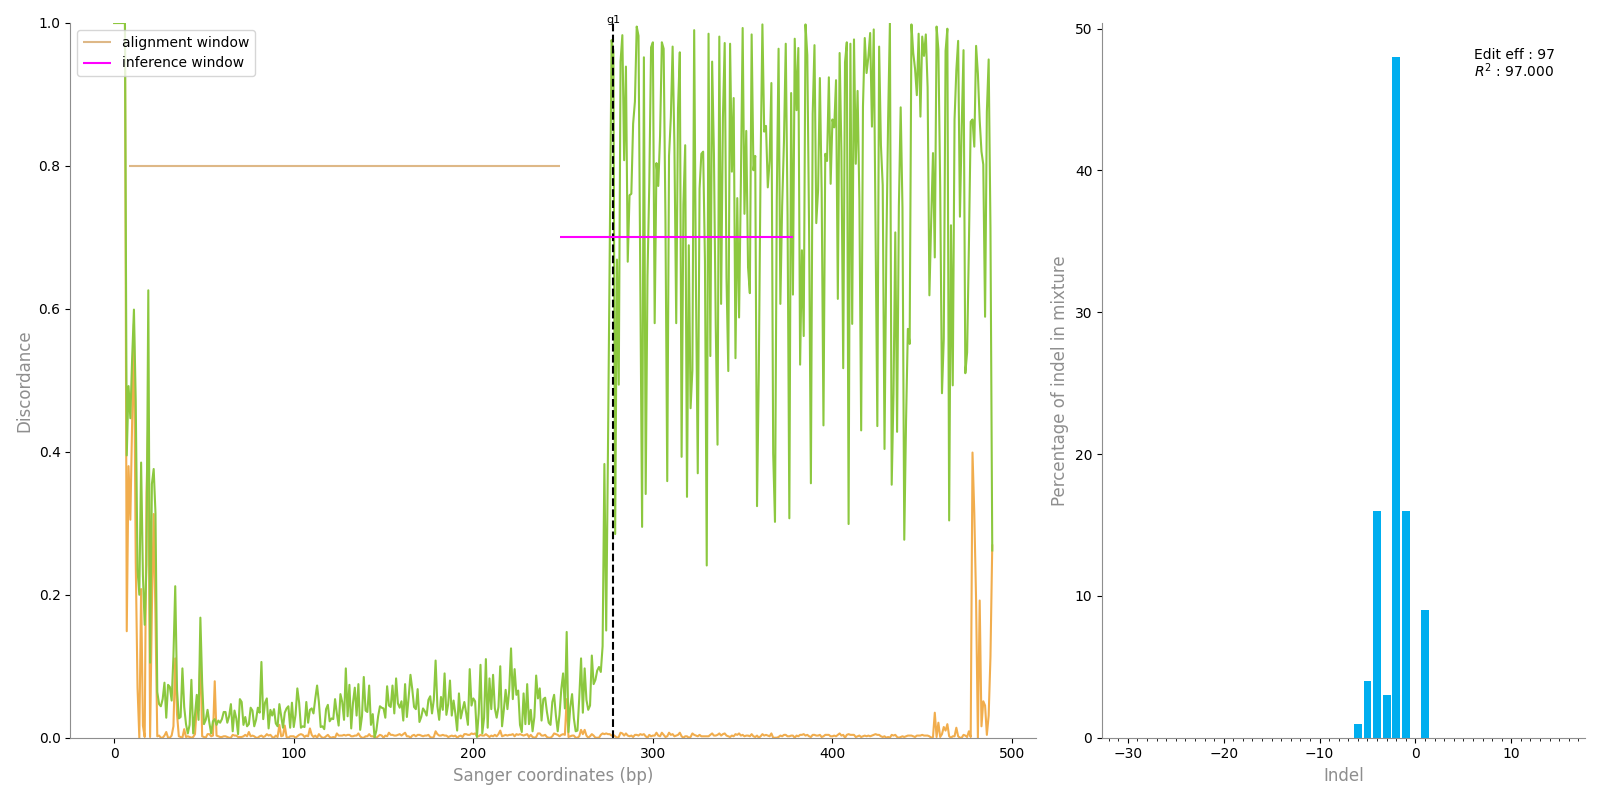

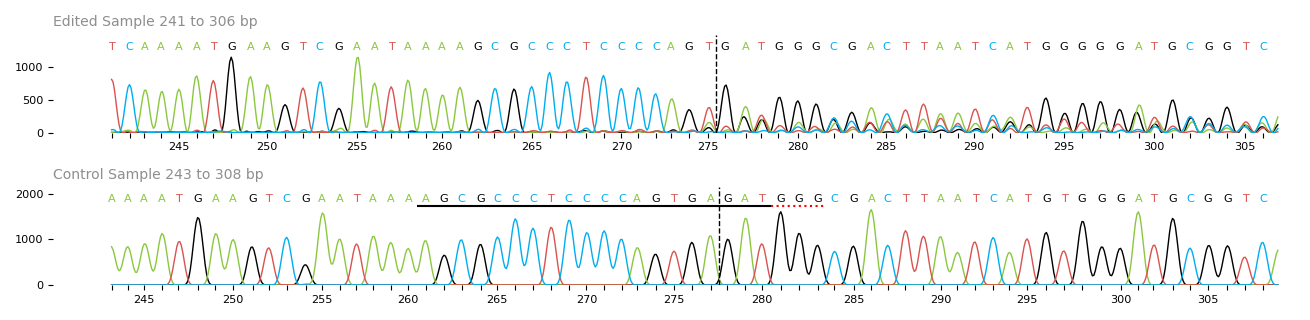


Ssa12 *trim25* SHK-1 polyclonal cell pool – Day 0 pre-infection – 0% INDEL


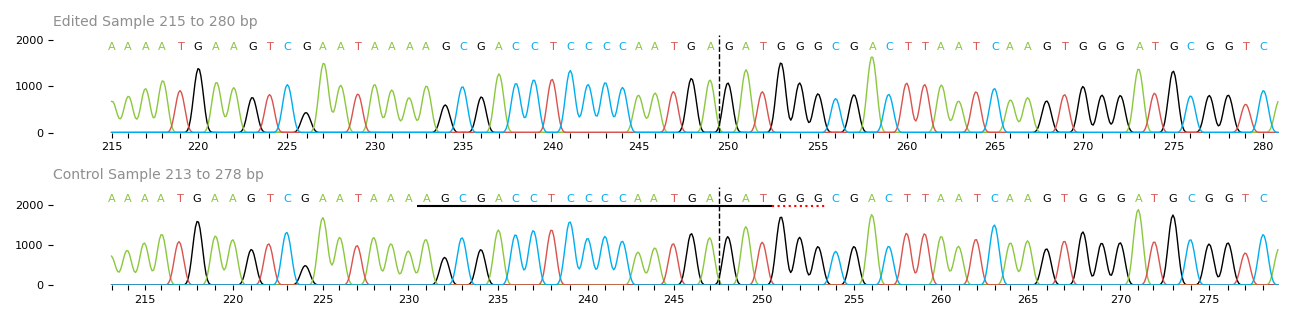


***Figure 2A*** *- Sequencing trace of Ssa02 trim25 and Ssa12 trim25 edited polyclonal cell pools. Cells edited with gRNA specific for Ssa02 trim25. Black line represents the gRNA sequence. Red line denotes PAM site. Vertical black dotted line represents DNA cut site.*

1. **Guide targeting Ssa12 trim25**

Ssa02 *trim25* SHK-1 polyclonal cell pool – Day 0 pre-infection – 19% INDEL


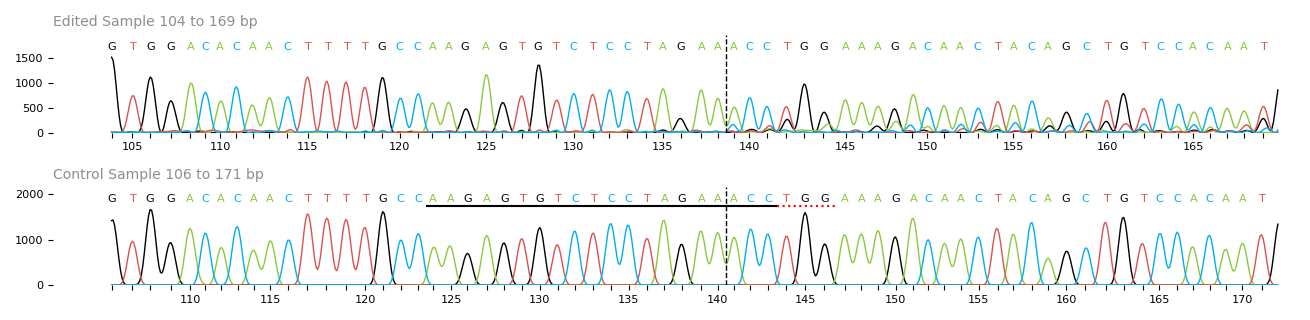


Ssa12 *trim25* SHK-1 polyclonal cell pool – Day 0 pre-infection – 97% INDEL


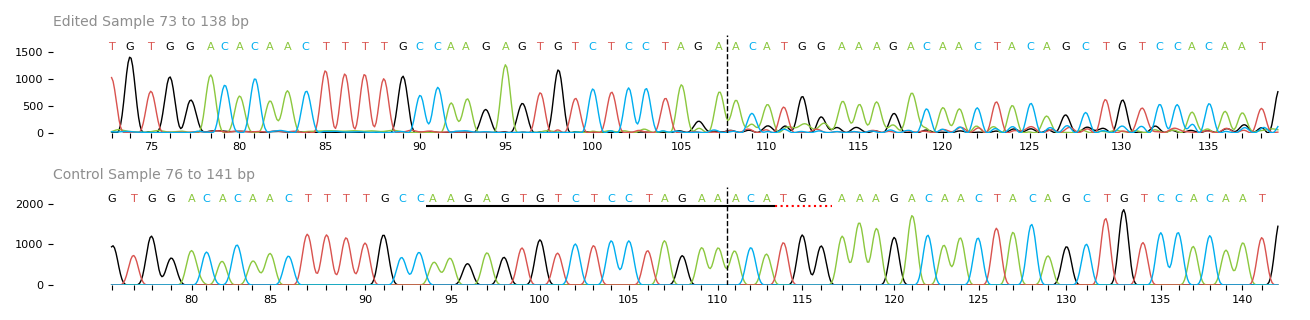


*
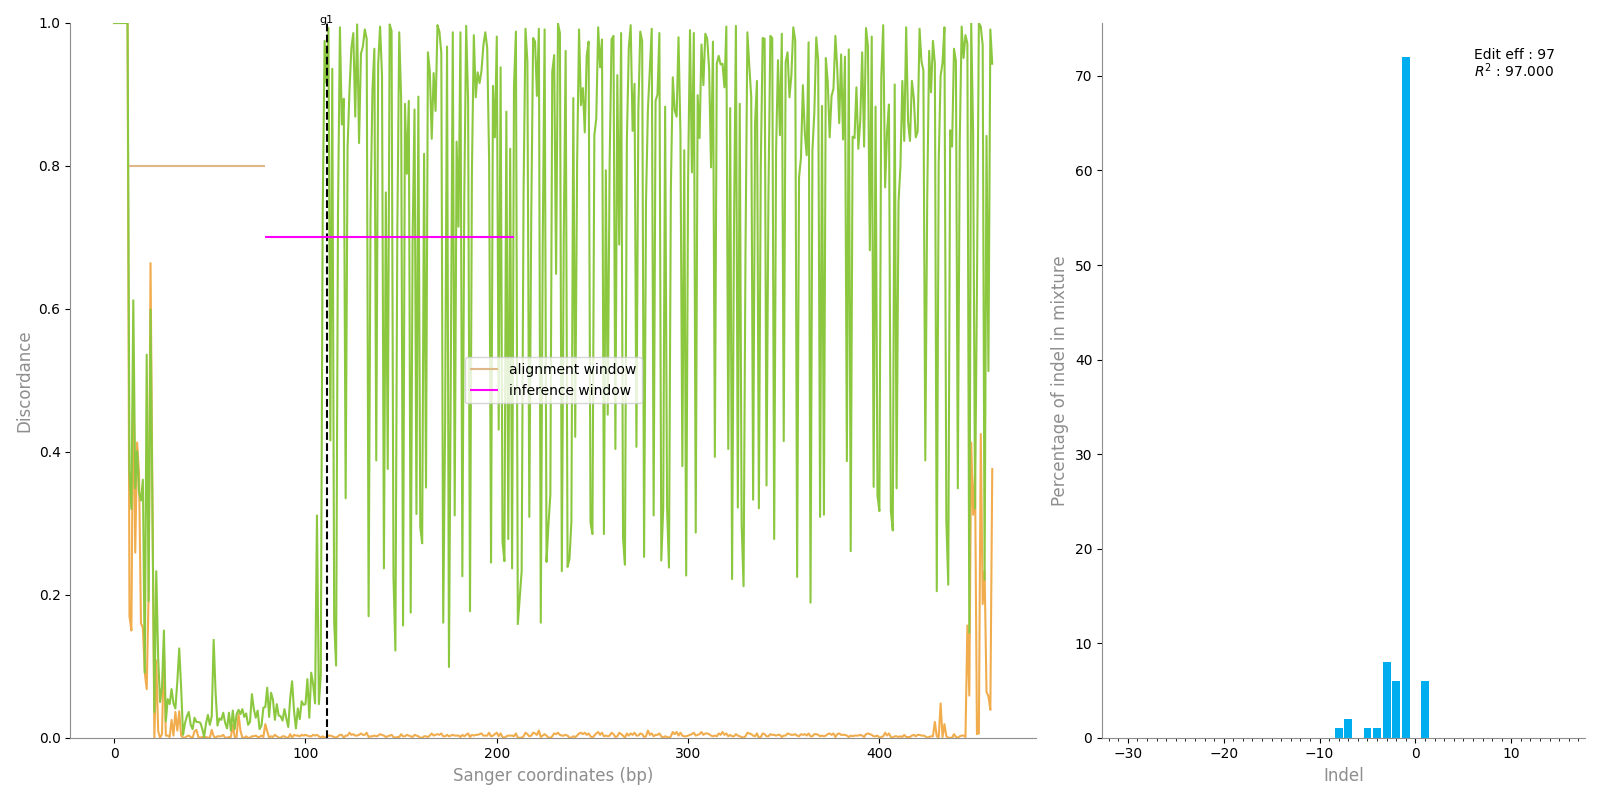
*

***Figure 2B*** *- Sequencing trace of Ssa02 trim25 and Ssa12 trim25 edited polyclonal cell pools. Cells edited with gRNA specific for Ssa12 trim25. Black line represents the gRNA sequence. Red line denotes PAM site. Vertical black dotted line represents DNA cut site.*

1. **Guide targeting Ssa02 trim25 + Ssa12 trim25**

Ssa02 *trim25* SHK-1 polyclonal cell pool – Day 0 pre-infection – 19% INDEL


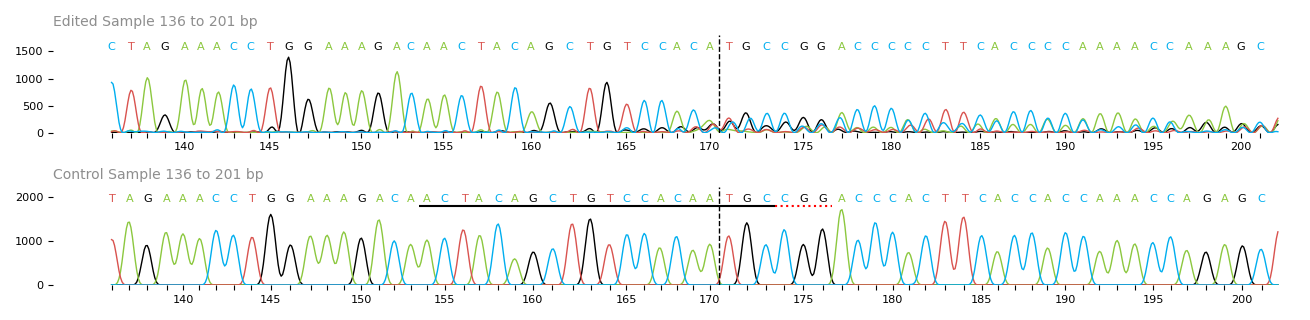


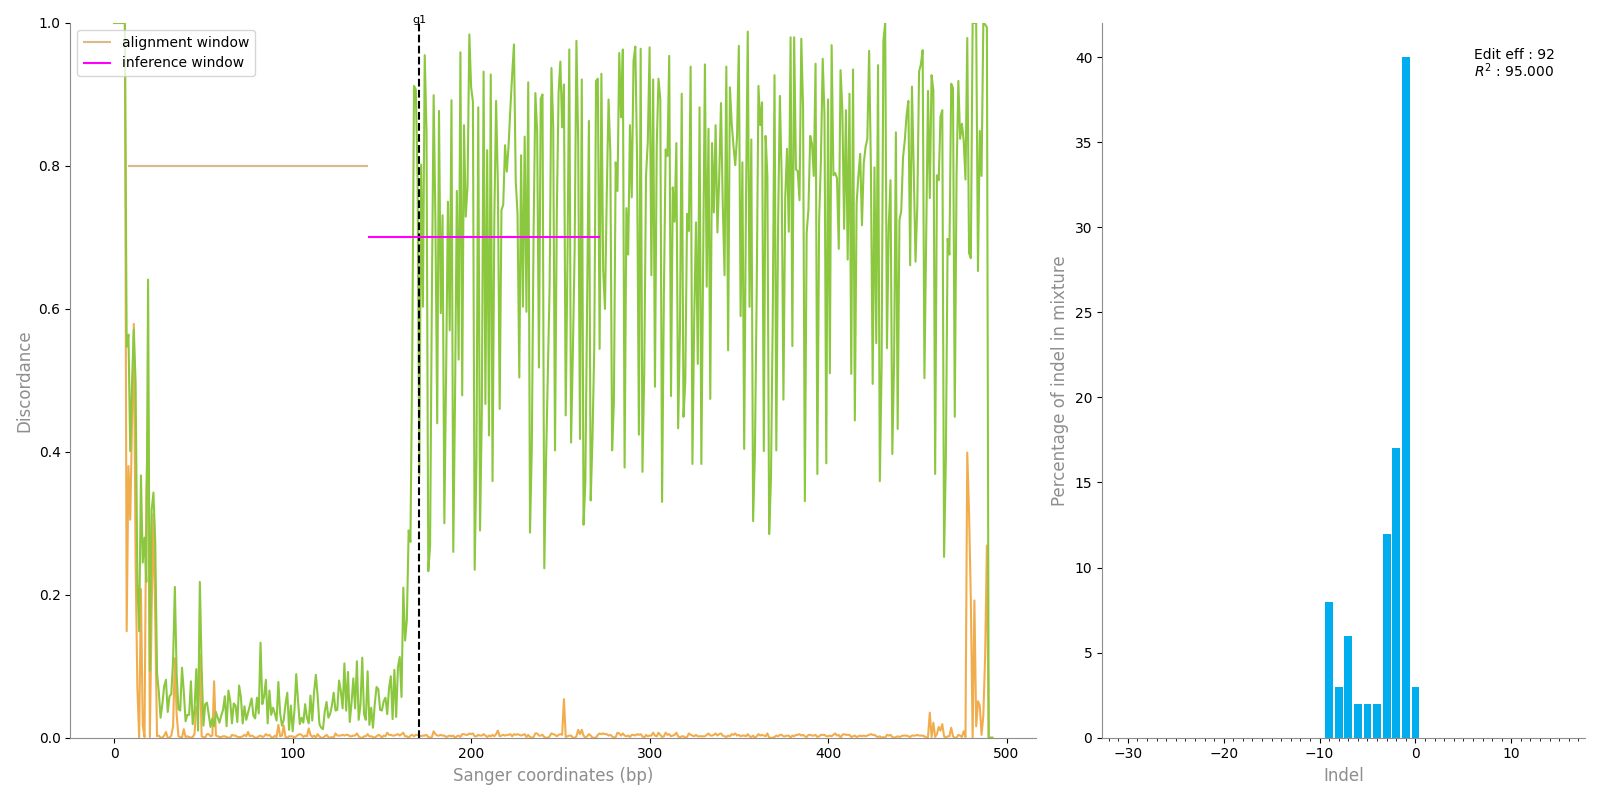


Ssa12 *trim25* SHK-1 polyclonal cell pool – Day 0 pre-infection – 97% INDEL


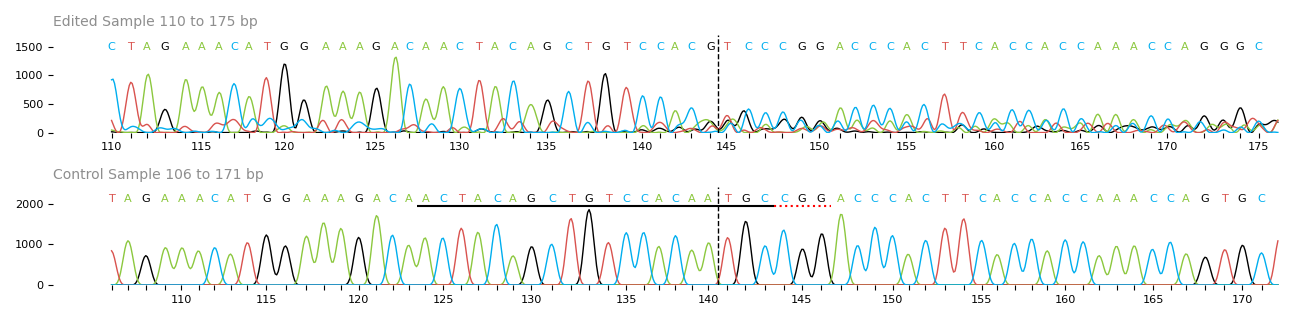


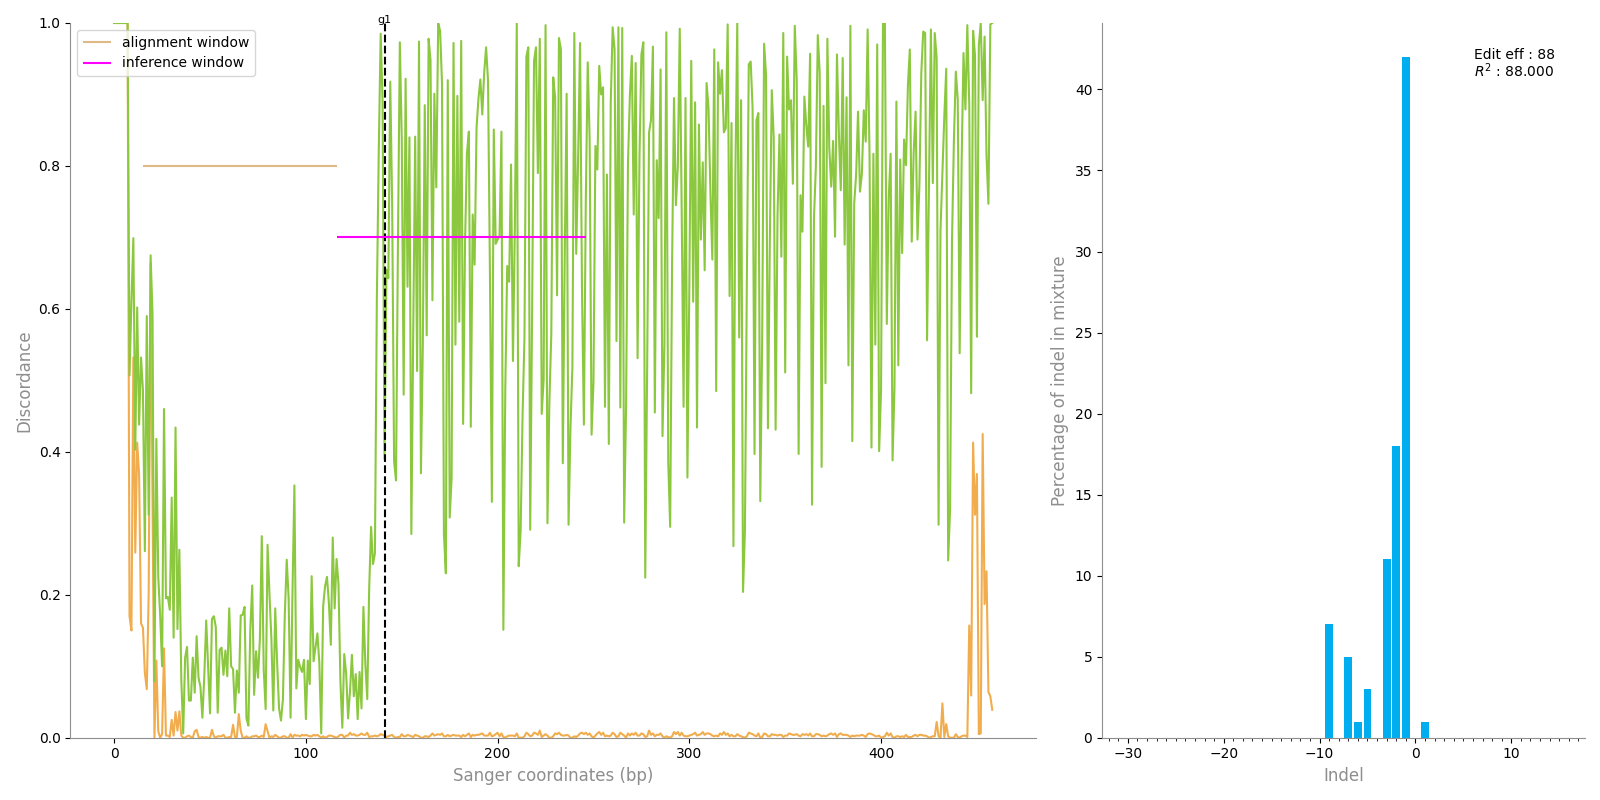


***Figure 2C*** *- Sequencing trace of Ssa02 trim25 and Ssa12 trim25 edited polyclonal cell pools. Cells edited with gRNA specific for both Ssa02 trim25 and Ssa12 trim25. Black line represents the gRNA sequence. Red line denotes PAM site. Vertical black dotted line represents DNA cut site.*

**Table 1.** List of fish species and outgroups used for OrthoFinder analyses.

| **Order** | **Species** | **Database** | **Assembly** |
| --- | --- | --- | --- |
| Petromyzontiformes | *Petromyzon marinus* | NCBI | kPetMar1.pri |
| Chimaeriformes | *Scyliorhinus canicula* | NCBI | sScyCan1.1 |
| Primates | *Homo sapiens* | Ensembl | GRCh38.p14 |
| Rodentia | *Mus musculus* | Ensembl | GRCm39 |
| Galliformes | *Gallus gallus* | Ensembl | bGalGal1.mat.broiler.GRCg7b |
| Testudines | *Gopherus evgoodei* | Ensembl | rGopEvg1_v1.p |
| Anura | *Xenopus tropicalis* | Ensembl | UCB_Xtro_10.0 |
| Ceratodontiformes | *Protopterus annectens* | NCBI | PAN1.0 |
| Coelacanthiformes | *Latimeria chalumnae* | NCBI | fLatCha1.pri |
| Cyprinodontiformes | *Xiphophorus maculatus* | Ensembl | X_maculatus-5.0-male |
| Acipenseriformes | *Polyodon spathula* | Ensembl - RR | ASM1765450v1 |
| Anabantiformes | *Anabas testudineus* | Ensembl | fAnaTes1.3 |
| Anguilliformes | *Anguilla anguilla* | Ensembl - RR | fAngAng1.pri |
| Atheriniformes | *Melanotaenia boesemani* | Ensembl - RR | fMelBoe1.pri |
| Batrachoidiformes | *Thalassophryne amazonica* | Ensembl - RR | fThaAma1.1 |
| Beloniformes | *Oryzias javanicus* | Ensembl | OJAV_1.1 |
| Blenniiformes | *Salarias fasciatus* | Ensembl | fSalaFa1.1 |
| Carangiformes | *Echeneis naucrates* | Ensembl | fEcheNa1.1 |
| Centrarchiformes | *Micropterus salmoides* | Ensembl - RR | ASM2243578v1 |
| Chaetodontiformes | *Chelmon rostratus* | Ensembl - RR | fCheRos1.pri |
| Characiformes | *Astyanax mexicanus - mexican tetra* | Ensembl - RR | AstMex3_surface |
| Characiformes | *Pygocentrus nattereri* | Ensembl | fPygNat1.pri |
| Cichliformes | *Astatotilapia calliptera* | Ensembl | fAstCal1.3 |
| Cichliformes | *Oreochromis niloticus* | Ensembl | O_niloticus_UMD_NMBU |
| Clupeiformes | *Denticeps clupeoides* | Ensembl | fDenClu1.2 |
| Cypriniformes | *Cyprinus carpio carpio* | Ensembl | Cypcar_WagV4.0 |
| Cypriniformes | *Danio rerio* | Ensembl | GRCz11 |
| Cypriniformes | *Beaufortia kweichowensis* | Ensembl - RR | ASM1915518v1 |
| Elopiformes | *Megalops atlanticus* | Ensembl - RR | MATL_1.0 |
| Esociformes | *Esox lucius* | Ensembl | fEsoLuc1.pri |
| Gadiformes | *Gadus morhua* - Atlantic cod | Ensembl | gadMor3.0 |
| Gobiiformes | *Neogobius melanostomus* | Ensembl | RGoby_Basel_V2 |
| Gobiiformes | *Periophthalmus magnuspinnatus* | NCBI | fPerMag1.2.pri |
| Gonorynchiformes | *Chanos chanos* | NCBI | fChaCha1.1 |
| Gymnotiformes | *Electrophorus electricus* | Ensembl | fEleEle1.pri |
| Holocentriformes | *Myripristis murdjan* | Ensembl | fMyrMur1.1 |
| Istiophoriformes | *Xiphias gladius* | NCBI | ASM1685928v1 |
| Kurtiformes | *Sphaeramia orbicularis* | Ensembl | fSphaOr1.1 |
| Labriformes | *Labrus bergylta* | NCBI | fLabBer1.1 |
| Lampriformes | *Lampris incognitus* | Ensembl - RR | ASM2205924v1 |
| Mugiliformes | *Mugil cephalus* | Ensembl - RR | CIBA_Mcephalus_1.1 |
| Order-level *incertae sedis* | *Lates calcarifer* | NCBI | TLL_Latcal_v3 |
| Order-level *incertae sedis* | *Amphiprion percula* | Ensembl | Nemo_v1 |
| Order-level *incertae sedis* | *Dicentrarchus labrax* | Ensembl | dlabrax2021 |
| Order-level *incertae sedis* | *Parambassis ranga* | Ensembl | fParRan2.2 |
| Order-level *incertae sedis* | *Larimichthys crocea* | Ensembl | L_crocea_2.0 |
| Order-level *incertae sedis* | *Scatophagus argus* | Ensembl - RR | fScaArg1.pri |
| Order-level *incertae sedis* | *Toxotes jaculatrix* | Ensembl - RR | fToxJac2.pri |
| Osmeriformes | *Hypomesus transpacificus* | NCBI | fHypTra1 |
| Osteoglossiformes | *Scleropages formosus* | Ensembl | fSclFor1.1 |
| Perciformes | *Cottoperca gobio* | Ensembl | fCotGob3.1 |
| Perciformes | *Cyclopterus lumpus* | Ensembl | fCycLum1.pri |
| Perciformes | *Sander lucioperca* | NCBI | SLUC_FBN_1.2 |
| Pleuronectiformes | *Scophthalmus maximus* | Ensembl | ASM1334776v1 |
| **Salmoniformes** | ***Salmo salar*** | **Ensembl** | **Ssal_v3.1** |
| Scombriformes | *Thunnus albacares* | Ensembl - RR | fThuAlb1.1 |
| Semionotiformes | *Lepisosteus oculatus* | Ensembl | LepOcu1 |
| Siluriformes | *Ictalurus punctatus* | NCBI | Coco_2.0 |
| Siluriformes | *Silurus meridionalis* | NCBI | ASM1480568v1 |
| Spariformes | *Sparus aurata* | Ensembl | fSpaAur1.1 |
| Synbranchiformes | *Mastacembelus armatus* | Ensembl | fMasArm1.2 |
| Syngnathiformes | *Synchiropus splendidus* | NCBI | RoL_Sspl_1.0 |
| Tetraodontiformes | *Takifugu rubripes* | Ensembl | fTakRub1.2 |
| Uranoscopiformes | *Ammodytes marinus* | Ensembl - RR | fAmmMar1.1 |
| Polypteriformes | *Erpetoichthys calabaricus* | NCBI | fErpCal1.3 |
